# Supplementary material for: Design and morphology control of a thiophene derivative through electrospraying using various solvents
Source: Royal Society of Chemistry journal article supplement (doi:10.1039/c5ra06468f), 2015-01-01
Supplement: c5ra06468f1.pdf [file c5ra06468f1.pdf]

## Design and Morphology Control of Thiophene Derivative through Electrospraying Using Various Solvents

Khadija K. Khanum<sup>1</sup>, Sandeep B. S<sup>1</sup>. and Praveen C. Ramamurthy<sup>\*,1,2</sup>

Department of Materials Engineering, Indian Institute of Science, Bangalore, 560012, India

Center for Nanoscience and Engineering, Indian Institute of Science, Bangalore, 560012, India

### Supporting Information

FESEM images of hollow spheres obtained through chloroform, tetrahydrofuran and 1,2 – dichloroethane as solvents.

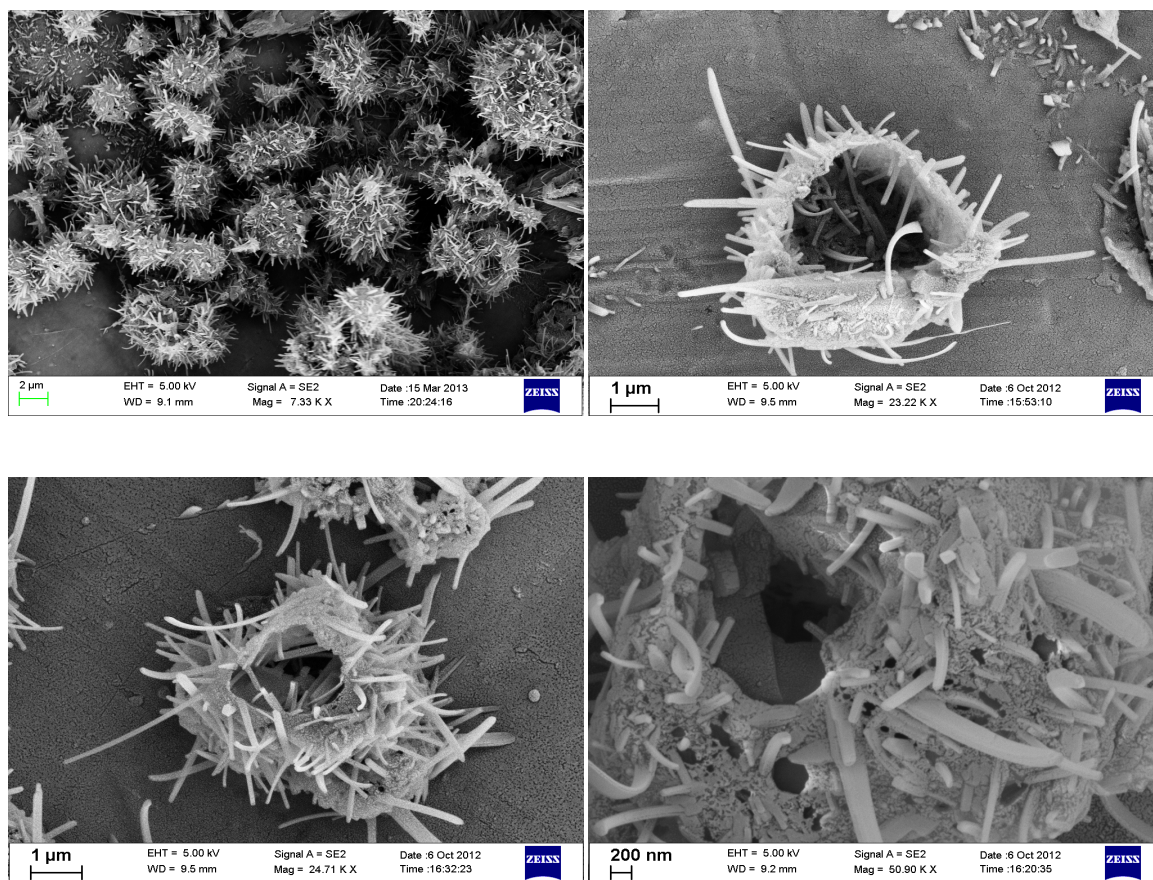

Figure S1. DTCPA in CF

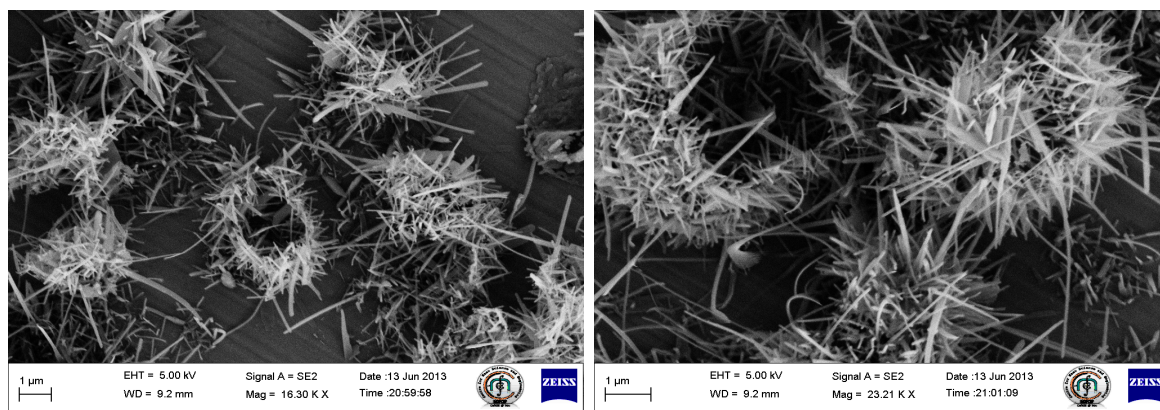

**Figure S2.** DTCPA in THF

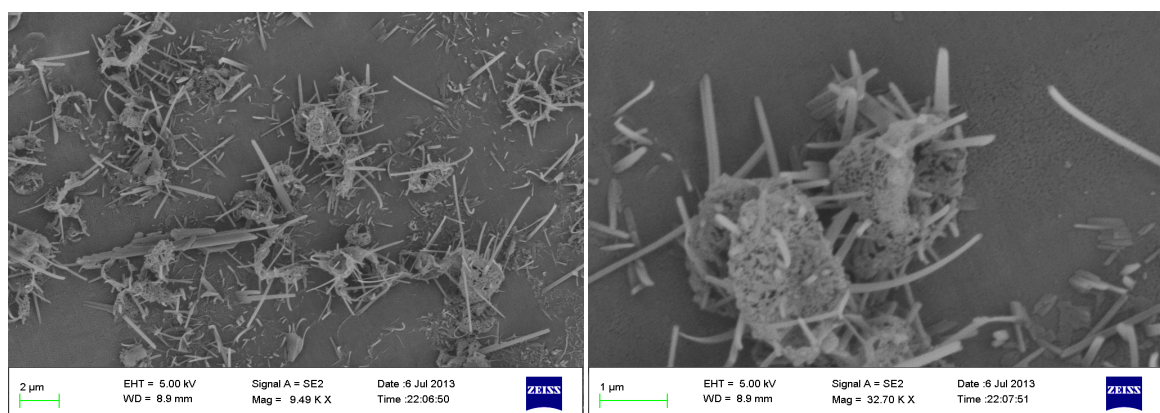

**Figure S3.** DTCPA in 12DCE
